# Supplementary material
Source: PubMed Central journal article supplement (PMC7210078)
Supplement: NIHMS1572763-supplement-316288_Uncut_Gel_Blots.pdf [file NIHMS1572763-supplement-316288_Uncut_Gel_Blots.pdf]

# Full Unedited gel for Figure 4C

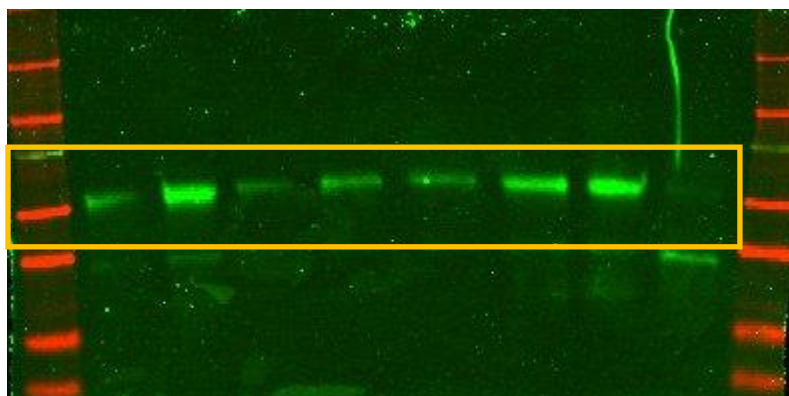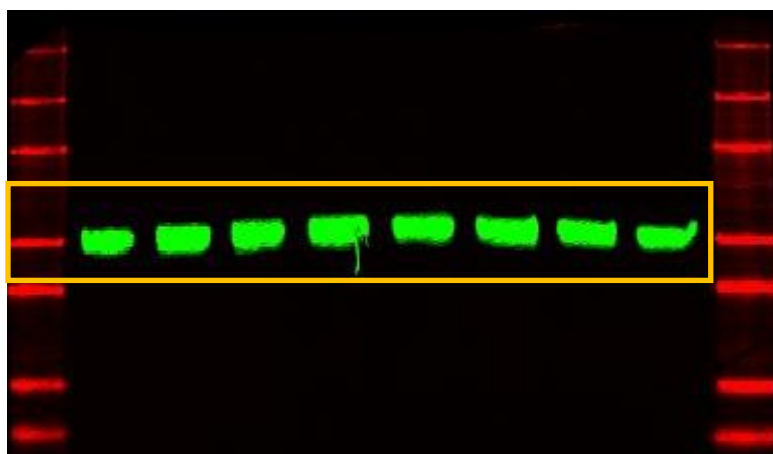

The cropped lanes in manuscript lanes were shown with yellow box in the unedited gel.
