# Supplementary material
Source: PubMed Central journal article supplement (PMC7210078)
Supplement: NIHMS1572763-supplement-Major_Resources_Table.pdf [file NIHMS1572763-supplement-Major_Resources_Table.pdf]

## Major Resources Table

In order to allow validation and replication of experiments, all essential research materials listed in the Methods should be included in the Major Resources Table below. Authors are encouraged to use public repositories for protocols, data, code, and other materials and provide persistent identifiers and/or links to repositories when available. Authors may add or delete rows as needed.

### Animals (in vivo studies)

| Species             | Vendor or Source | Background Strain | Sex | Persistent ID / URL                                                               |
|---------------------|------------------|-------------------|-----|-----------------------------------------------------------------------------------|
| WT C57b/6J          | Jackson Lab      | WT C57b/6J        | M   | <a href="https://www.jax.org/strain/000664">https://www.jax.org/strain/000664</a> |
| WT C57b/6N          | Jackson Lab      | WT C57b/6N        | M   | <a href="https://www.jax.org/strain/005304">https://www.jax.org/strain/005304</a> |
| NOX2 <sup>-/-</sup> | Jackson Lab      | WT C57b/6J        | M   | <a href="https://www.jax.org/strain/002365">https://www.jax.org/strain/002365</a> |

### Genetically Modified Animals

|                 | Species                             | Vendor or Source | Background Strain | Other Information                                        | Persistent ID / URL        |
|-----------------|-------------------------------------|------------------|-------------------|----------------------------------------------------------|----------------------------|
| Parent - Male   | Ser280Ala KI                        | J Chen Lab       | C57b/6J           |                                                          | Publication cited in paper |
| Parent - Female | Ser280Ala KI                        | J Chen Lab       | C57b/6J           |                                                          | Publication cited in paper |
| Parent - Male   | MMVV-KI                             | ME Anderson Lab  | C57b/6J           |                                                          | Publication cited in paper |
| Parent - Female | MMVV-KI                             | ME Anderson Lab  | C57b/6J           |                                                          | Publication cited in paper |
| Parent - Male   | CaMKII $\delta$ cardiac-specific KO | JH Brown Lab     | Black Swiss       | Been crossbred into C57b/6J for more than 9 generations  | Publication cited in paper |
| Parent - Female | CaMKII $\delta$ cardiac-specific KO | JH Brown Lab     | Black Swiss       | Been crossbred into C57b/6J for more than 9 generations  | Publication cited in paper |
| Parent - Male   | CaMKII $\delta$ global KO           | JH Brown Lab     | C57b/6J           |                                                          | Publication cited in paper |
| Parent - Female | CaMKII $\delta$ global KO           | JH Brown Lab     | C57b/6J           |                                                          | Publication cited in paper |
| Parent - Male   | Mito-Grx1-roGFP2                    | DM Katschinski   | C57b/6N           | Been crossbred in to C57b/6J for more than 9 generations | Publication cited in paper |
| Parent - Female | Mito-Grx1-roGFP2                    | DM Katschinski   | C57b/6N           | Been crossbred in to C57b/6J for more than 9 generations | Publication cited in paper |
| Parent - Male   | Cyto-Grx1-roGFP2                    | DM Katschinski   | C57b/6N           | Been crossbred in to C57b/6J for more than 9 generations | Publication cited in paper |
| Parent - Female | Cyto-Grx1-roGFP2                    | DM Katschinski   | C57b/6N           | Been crossbred in to C57b/6J for more than 9 generations | Publication cited in paper |

### Antibodies

| Target antigen | Vendor or Source | Catalog # | Working concentration | Lot # (preferred but not required) | Persistent ID / URL |
|----------------|------------------|-----------|-----------------------|------------------------------------|---------------------|
|----------------|------------------|-----------|-----------------------|------------------------------------|---------------------|

DOI [to be added]

|                 |           |           |         |           |                                                                                                                                                                                                                                                            |
|-----------------|-----------|-----------|---------|-----------|------------------------------------------------------------------------------------------------------------------------------------------------------------------------------------------------------------------------------------------------------------|
| CaMKII $\delta$ | ZYMED Inc | N/A       | 1:800   |           | <a href="#">Ryanodine receptor phosphorylation at Serine 2030, 2808 and 2814 in rat cardiomyocytes.</a><br><b>Huke S, Bers DM.</b><br>Biochem Biophys Res Commun. 2008 Nov 7;376(1):80-5. doi: 10.1016/j.bbrc.2008.08.084. Epub 2008 Aug 26. PMID:18755143 |
| CTD110.6        | Sigma     | MABS125   | 1:500   | 3083560   | <a href="https://www.emdmillipore.com/US/en/product/Anti-O-GlcNAc-Antibody-clone-CTD110.6,MM_NF-MABS1254">https://www.emdmillipore.com/US/en/product/Anti-O-GlcNAc-Antibody-clone-CTD110.6,MM_NF-MABS1254</a>                                              |
| Mouse IgM       | Li-COR    | 962-32280 | 1:10000 | C70808-03 | <a href="https://www.licor.com/bio/reagents/irdye-800cw-goat-anti-mouse-igm-mu-chain-specific-secondary-antibody">https://www.licor.com/bio/reagents/irdye-800cw-goat-anti-mouse-igm-mu-chain-specific-secondary-antibody</a>                              |

### Cultured Cells

| Name          | Vendor or Source | Sex (F, M, or unknown) | Persistent ID / URL |
|---------------|------------------|------------------------|---------------------|
| Human iPSC-CM | M Mercola Lab    | unknown                |                     |
|               |                  |                        |                     |
|               |                  |                        |                     |
